# Supplementary material
Source: Elsevier journal article supplement (https://rcastoragev2.blob.core.windows.net/7ff7411de1388eba9fabbc17a8b1831f/mmc1.pdf)
Supplement: mmc1 [file mmc1.pdf]

## APPENDIX 1 –Additional materials to be considered as web/supplementary tables

*Incidence of overweight and obesity throughout childhood in the entire ALSPAC cohort among boys and girls , England, 1991-2007*

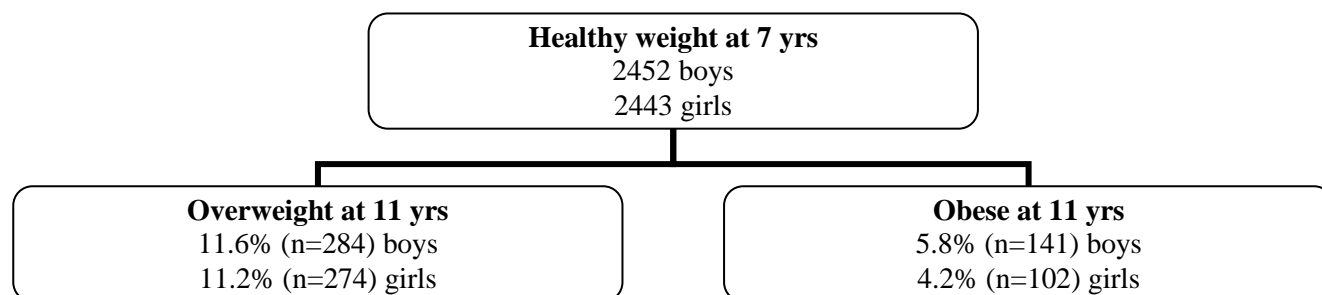

**Figure 1: Incidence of overweight and obesity among boys and girls from 7 years to 11 years in the entire ALSPAC cohort.** Only those who were followed up at 11 years were used to calculate the incidence of overweight and obesity.

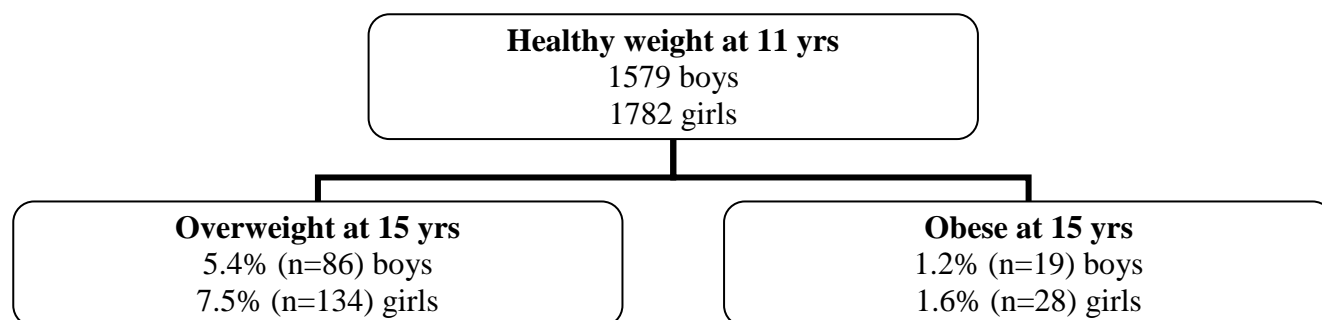

**Figure 2: Incidence of overweight and obesity among boys and girls from 11 to 15 years in the entire ALSPAC cohort.** Only those who were followed up at 15 years were used to calculate the incidence of overweight and obesity.

## **CiF SAMPLE**

**Table 1: Children in each weight status category at age 7 by weight status category at age 3 years in the CiF group, n (%), England, 1991-2007**

|                                          | <b>Healthy weight<br/>at 7 yrs n=795</b> | <b>Overweight at<br/>7 yrs n=85</b> | <b>Obese at<br/>7 yrs n=84</b> | <b>Missing at 7 yrs<br/>but not at 3 yrs</b> |
|------------------------------------------|------------------------------------------|-------------------------------------|--------------------------------|----------------------------------------------|
| <b>Healthy weight at 3 yrs n=846</b>     | 610 (72.1)                               | 36 (4.2)                            | 35 (4.1)                       | 165 (19.5)                                   |
| <b>Overweight at 3 yrs n=122</b>         | 60 (49.2)                                | 19 (15.6)                           | 15 (12.3)                      | 28 (23.0)                                    |
| <b>Obese at 3 yrs n=83</b>               | 22 (26.5)                                | 17 (20.5)                           | 23 (27.7)                      | 21 (25.3)                                    |
| <b>Missing at 3 yrs but not at 7 yrs</b> | 103 (81.1)                               | 13 (10.2)                           | 11 (8.7)                       |                                              |

Footnote: used the total number of healthy weight children at 3 years (n=846) to calculate the % of healthy weight, overweight and obese children at 7 years as well as the % missing at 7 years. Footnote:

The missing categories include those not attending the measurement clinic and those attending the clinic but not providing data to calculate BMI.

**Table 2: Proportion of children in each weight status category at age 11 by weight status category at age 7 years in the CiF group, n (%), England , 1991-2007**

|                                           | <b>Healthy weight<br/>at 11 yrs n=597</b> | <b>Overweight at<br/>11 yrs n=125</b> | <b>Obese at<br/>11 yrs n=142</b> | <b>Missing at 11 yrs<br/>but not 7 yrs</b> |
|-------------------------------------------|-------------------------------------------|---------------------------------------|----------------------------------|--------------------------------------------|
| <b>Healthy weight at 7 yrs n=795</b>      | 527 (66.3)                                | 76 (9.6)                              | 43 (5.4)                         | 149 (18.7)                                 |
| <b>Overweight at 7 yrs n=85</b>           | 14 (16.5)                                 | 28 (32.9)                             | 28 (32.9)                        | 15 (17.6)                                  |
| <b>Obese at 7 yrs n=84</b>                | 6 (7.1)                                   | 6 (7.1)                               | 57 (67.8)                        | 15 (17.9)                                  |
| <b>Missing at 7 yrs but not at 11 yrs</b> | 50 (63.3)                                 | 15 (19.0)                             | 14 (17.7)                        |                                            |

**Table 3: Proportion of children in each weight status category at age 15 by weight status category at age 11 years in the CIF group, n (%), England, 1991-2007**

|                                            | <b>Healthy weight at 15 yrs n=484</b> | <b>Overweight at 15 yrs n=80</b> | <b>Obese at 15 yrs n=87</b> | <b>Missing at 15 yrs but not at 11 yrs</b> |
|--------------------------------------------|---------------------------------------|----------------------------------|-----------------------------|--------------------------------------------|
| <b>Healthy weight at 11 yrs n=597</b>      | 396 (66.3)                            | 24 (4.0)                         | 7 (1.2)                     | 170 (28.5)                                 |
| <b>Overweight at 11 yrs n=125</b>          | 40 (32.0)                             | 32 (25.6)                        | 14 (11.2)                   | 39 (31.2)                                  |
| <b>Obese at 11 yrs n=142</b>               | 18 (12.7)                             | 19 (13.4)                        | 55 (38.7)                   | 50 (35.2)                                  |
| <b>Missing at 11 yrs but not at 15 yrs</b> | 30 (65.2)                             | 5 (10.9)                         | 11 (23.9)                   |                                            |

### **ENTIRE ALSPAC COHORT**

**Table 4: Proportion of children in each weight status category at age 11 by weight status category at age 7 years in the entire ALSPAC cohort, n (%), England, 1991-2007**

|                                        | <b>Healthy weight at 11 yrs n=4778</b> | <b>Overweight at 11 yrs n=907</b> | <b>Obese at 11 yrs n=1066</b> | <b>Missing at 11 yrs but not at 7 yrs</b> |
|----------------------------------------|----------------------------------------|-----------------------------------|-------------------------------|-------------------------------------------|
| <b>Healthy weight at 7 yrs n=6394</b>  | 4094 (64.0)                            | 558 (8.7)                         | 243 (3.8)                     | 1499 (23.4)                               |
| <b>Overweight at 7 yrs n=714</b>       | 104 (14.5)                             | 194 (27.2)                        | 249 (34.9)                    | 167 (23.4)                                |
| <b>Obese at 7 yrs n=651</b>            | 17 (2.6)                               | 43 (6.6)                          | 407 (62.5)                    | 184 (28.3)                                |
| <b>Missing at 7 yrs but not 11 yrs</b> | 563 (66.9)                             | 112 (13.3)                        | 167 (19.8)                    |                                           |

**Table 5: Proportion of children in each weight status category at age 15 by weight status category at age 11 years in the entire ALSPAC cohort, n (%), England, 1991-2007**

|                                            | <b>Healthy weight at 15 yrs n=3855</b> | <b>Overweight at 15 yrs n=666</b> | <b>Obese at 15 yrs n=641</b> | <b>Missing at 15 yrs but not at 11 yrs</b> |
|--------------------------------------------|----------------------------------------|-----------------------------------|------------------------------|--------------------------------------------|
| <b>Healthy weight at 11 yrs n=4778</b>     | 3094 (64.8)                            | 220 (4.6)                         | 47 (1.0)                     | 1417 (29.7)                                |
| <b>Overweight at 11 yrs n=907</b>          | 304 (33.5)                             | 206 (22.7)                        | 106 (11.7)                   | 291 (32.1)                                 |
| <b>Obese at 11 yrs n=1066</b>              | 111 (10.4)                             | 170 (15.9)                        | 409 (38.4)                   | 376 (35.3)                                 |
| <b>Missing at 11 yrs but not at 15 yrs</b> | 346 (69.9)                             | 70 (14.1)                         | 79 (16.0)                    |                                            |

**BOYS AND GIRLS (ENTIRE ALSPAC COHORT)**

The proportion of boys and girls in each weight status category at age 11 by weight status category at age 7 years is shown in Table 5a and 5b.

**Table 5a: Proportion of BOYS in each weight status category at age 11 by weight status category at age 7 years in the entire ALSPAC cohort, n (%), England, 1991-2007**

|                                        | <b>Healthy weight at<br/>11 yrs n=2332</b> | <b>Overweight at<br/>11 yrs n=447</b> | <b>Obese at<br/>11 yrs n=562</b> | <b>Missing at 11 yrs<br/>but not at 7 yrs</b> |
|----------------------------------------|--------------------------------------------|---------------------------------------|----------------------------------|-----------------------------------------------|
| <b>Healthy weight at 7 yrs n=3273</b>  | 2027 (61.9)                                | 284 (8.7)                             | 141 (4.3)                        | 821 (25.1)                                    |
| <b>Overweight at 7 yrs n=328</b>       | 40 (12.2)                                  | 92 (28.0)                             | 113 (34.4)                       | 83 (25.3)                                     |
| <b>Obese at 7 yrs n=345</b>            | 7 (2.0)                                    | 16 (4.6)                              | 223 (64.6)                       | 99 (28.7)                                     |
| <b>Missing at 7 yrs but not 11 yrs</b> | 258 (64.8)                                 | 55 (13.8)                             | 85 (21.4)                        |                                               |

**Table 5b: Proportion of GIRLS in each weight status category at age 11 by weight status category at age 7 years in the entire ALSPAC cohort, n (%), England, 1991-2007**

|                                          | <b>Healthy weight at<br/>11 yrs n=2446</b> | <b>Overweight at<br/>11 yrs n=460</b> | <b>Obese at<br/>11 yrs n=504</b> | <b>Missing at 11 yrs<br/>but not at 7 yrs</b> |
|------------------------------------------|--------------------------------------------|---------------------------------------|----------------------------------|-----------------------------------------------|
| <b>Healthy weight at 7 yrs n=3121</b>    | 2067 (66.2)                                | 274 (8.8)                             | 102 (3.3)                        | 678 (21.7)                                    |
| <b>Overweight at 7 yrs n=386</b>         | 64 (16.6)                                  | 102 (26.4)                            | 136 (35.2)                       | 84 (21.8)                                     |
| <b>Obese at 7 yrs n=306</b>              | 10 (3.3)                                   | 27 (8.8)                              | 184 (60.1)                       | 85 (27.8)                                     |
| <b>Missing at 7 years but not 11 yrs</b> | 305 (68.7)                                 | 57 (12.8)                             | 82 (18.5)                        |                                               |

The proportion of boys and girls in each weight status category at age 15 by weight status category at age 11 years is shown in Table 6a and 6b.

**Table 6a: Proportion of boys in each weight status category at age 15 by weight status category at age 11 years in the entire ALSPAC cohort, n (%), England 1991-2007**

|                                            | <b>Healthy weight<br/>at 15 yrs n=1837</b> | <b>Overweight at<br/>15 yrs n=313</b> | <b>Obese at<br/>15 yrs n=299</b> | <b>Missing at 15 yrs<br/>but not at 11 yrs</b> |
|--------------------------------------------|--------------------------------------------|---------------------------------------|----------------------------------|------------------------------------------------|
| <b>Healthy weight at 11 yrs n=2332</b>     | 1474 (63.2)                                | 86 (3.7)                              | 19 (0.8)                         | 753 (32.3)                                     |
| <b>Overweight at 11 yrs n=447</b>          | 163 (36.5)                                 | 102 (22.8)                            | 38 (8.5)                         | 144 (32.2)                                     |
| <b>Obese at 11 yrs n=562</b>               | 60 (10.7)                                  | 90 (16.0)                             | 213 (37.9)                       | 199 (35.4)                                     |
| <b>Missing at 11 yrs but not at 15 yrs</b> | 140 (26.9)                                 | 351 (67.5)                            | 29 (5.6)                         |                                                |

**Table 6b: Proportion of Girls in each weight status category at age 15 by weight status category at age 11 years in the entire ALSPAC cohort, England, n (%), 1991-2007**

|                                            | <b>Healthy weight<br/>at 15 yrs n=2018</b> | <b>Overweight at<br/>15 yrs n=353</b> | <b>Obese at<br/>15 yrs n=342</b> | <b>Missing at 15 yrs<br/>but not at 11 yrs</b> |
|--------------------------------------------|--------------------------------------------|---------------------------------------|----------------------------------|------------------------------------------------|
| <b>Healthy weight at 11 yrs n=2446</b>     | 1620 (66.2)                                | 134 (5.5)                             | 28 (1.1)                         | 664 (27.1)                                     |
| <b>Overweight at 11 yrs n=460</b>          | 141 (30.6)                                 | 104 (22.6)                            | 68 (14.8)                        | 147 (32.0)                                     |
| <b>Obese at 11 yrs n=504</b>               | 51 (10.1)                                  | 80 (15.9)                             | 196 (38.9)                       | 177 (35.1)                                     |
| <b>Missing at 11 yrs but not at 15 yrs</b> | 206 (70.8)                                 | 35 (12.0)                             | 50 (17.2)                        |                                                |
